# Supplementary material
Source: publisher figshare collection journal article supplement (https://asha.figshare.com/articles/dataset/_/14963580)
Supplement: Supplementary file 1 [file 2]

## Supplemental Appendix B

### Stimuli for the Directed Speech Style Task (Task 3)

1. Ted is **driving** on the street.
2. Fred is **not**.
3. Fred is **driving** through the **mud**.
4. Ted is **driving** around the **mud**.
5. Ted says, "**Do you** want to wash off the **mud**?"
6. **Ted** looks at the **mud**.
7. Ted sprays **Fred**.
8. Fred is **getting** wet.
9. Fred is **driving** over the log.
10. Ted is **not**.
11. **Ted** carries the basket.
12. Fred spreads the blanket.
13. Fred and Ted start to eat.
14. Fred says, "**Did you** feel a raindrop?"
15. Oh no the lightening hit!
16. Fred and **Ted** run fast back to their cars.
17. Ted is **getting** wet.
18. Fred is **not**.
19. Fred and Ted drive on a desert road.
20. Fred says, "Aren't **you** hot?"
21. Ted says, "Why don't **you** look!"
22. The **plant** made the tire go flat.
23. **Ted** finds a pump.
24. **Fred** finds a fork.
25. Ted is **pumping**.
26. **Fred** finds fruit.
27. Ted is **pumping** fast.
28. **Fred** finds bread, milk and fruit.
29. Oh no, Fred is **going** up!
30. Fred shouts, "Can't **you** help?"
31. **Fred** floats up.
32. Ted is **driving** on the ground.
33. The **bird** pops the tire with his beak.
34. **Fred** yells "Help!"
35. Back on the ground safe and sound.
36. The bird says, "Aren't **you** glad?"
37. Ted eats a **big** stack of food.
38. Fred eats a fruit and an egg.

*Note.* Phonological targets are highlighted in bold.
