# Supplementary material
Source: publisher figshare collection journal article supplement (https://asha.figshare.com/articles/dataset/_/14963580)
Supplement: Supplementary file 2 [file 2]

## Supplemental Appendix A

Script Told by the Experimenter for the Spontaneous Speech Task (Task 2)

Fred was **big**. **Ted** was little. **Fred** has money. Ted does not. Fred is **getting** wet. Ted is not. **Fred** plays the flute. **Ted** plays the tuba. Fred eats some spinach. Ted eats a beet. Here they're **painting** the house. **Fred** paints green. **Ted** paints red. Fred and Ted are **going** for a drive. Fred is **driving** slowly. Ted is **driving** fast. Ted says "where **do you** wanna go?" Fred says "why don't **you** decide?" They go to the mountains. Ted is **skiing**. Fred is **skating**. Afterwards Fred is cold. Ted is hot. Fred and Ted wanna sleep. Fred says, "don't **you** wanna stay there?" Fred is **sleeping** in the little green bed. Ted is **sleeping** in the big red bed. On the phone they say, "Good**n**ight **Fred**. Good night **Ted**." Fred and Ted don't sleep well all night. On the phone they say, "wouldn't **you** like to chat?" They walk **up**. They walk **down**. They walk and walk. Ted asks, "**did you** sleep well **Fred**?" Fred says, "my **bed** was too small." Ted says "my **bed** was to big." Ted says, "what **do you** wanna do?" Then the bird says "I know. Why don't **you** trade?" Fred and Ted are **running** back. Ted is **jumping** into the little bed. Fred is **jumping** into the big bed. Fred and Ted sleep. They sleep all day. The bird says, "**do you** see? Big dogs need big beds. Little dogs need little beds.

*Note.* Phonological targets are highlighted in bold.
